# Supplementary material for: Transgenic mouse model for conditional expression of influenza hemagglutinin-tagged human SLC20A1/PIT1
Source: PubMed Central journal article supplement (PMC6793878; doi:10.1371/journal.pone.0223052), 2019-10-15

# Method to capture image: Quantity one software Biorad

Figure panel: Figure 1(B)

Recombined *H11* allele- at 3' junction (2,4)

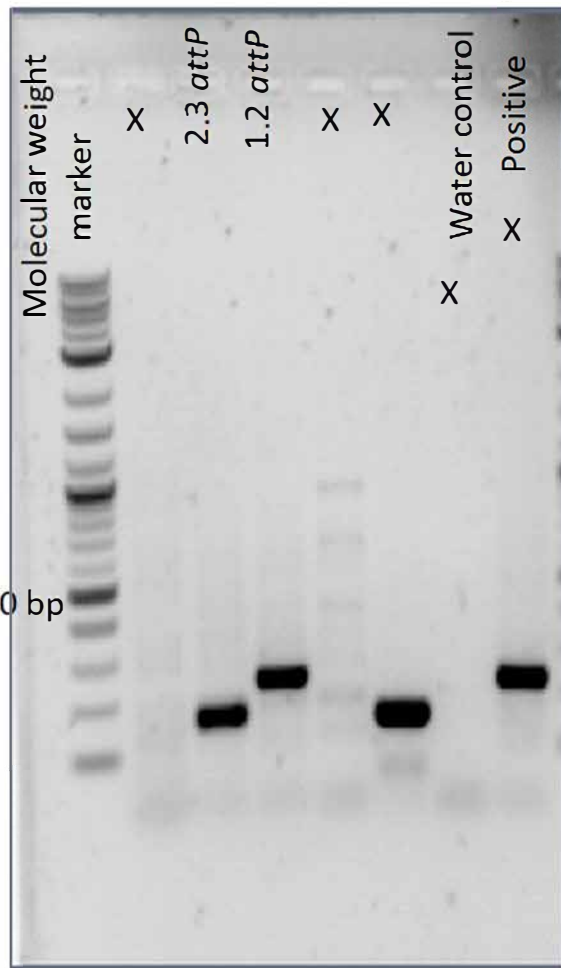

Recombined *H11* allele- at 5' junction (1,3)

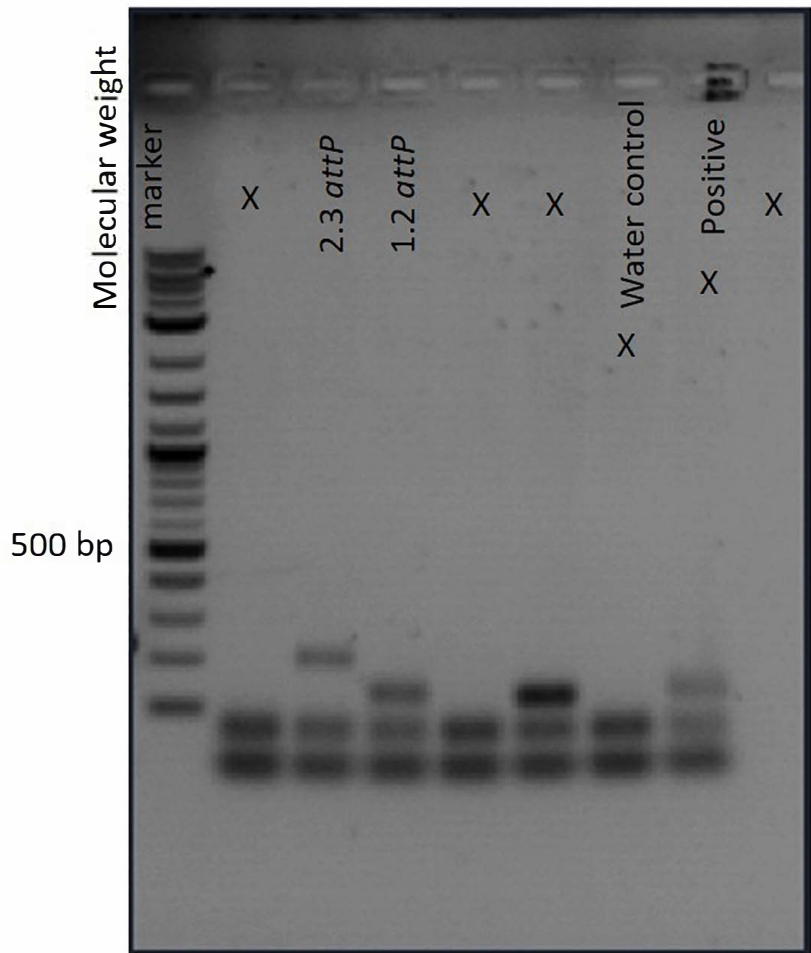

Method to capture image: Quantity one software Biorad  
Figure panel: Figure 1(D)

*H11* allele (896,897) at 356 bp

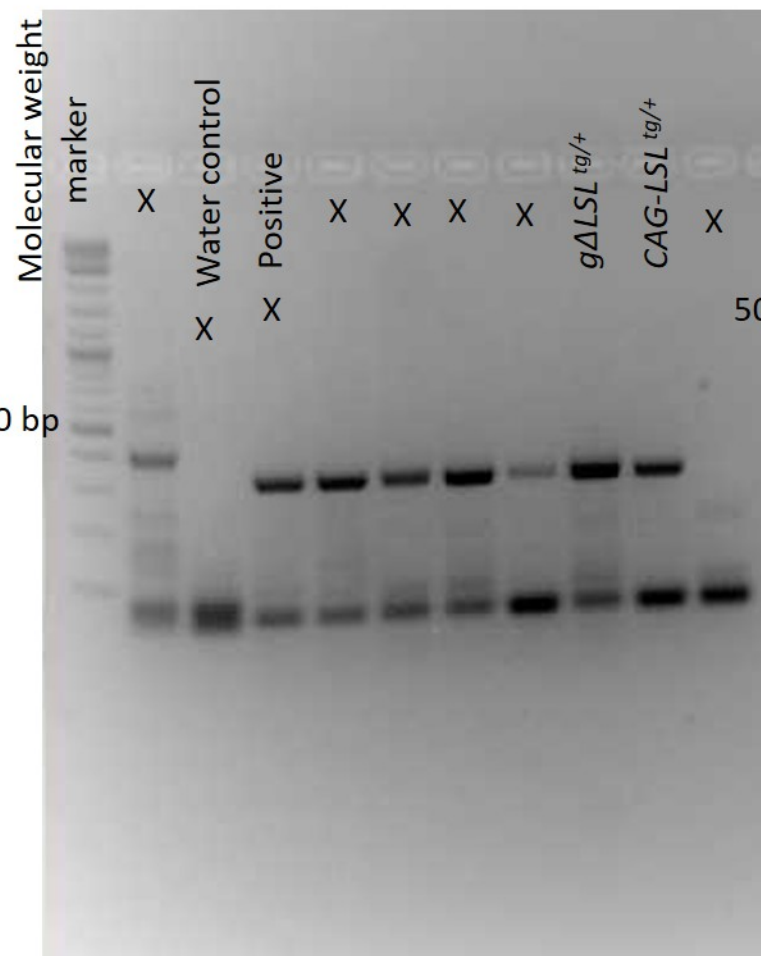

*CAG-LSL-HA-hPIT1* (879,883) at 530 bp

*Cre-recombinase* (823,824) at 400 bp

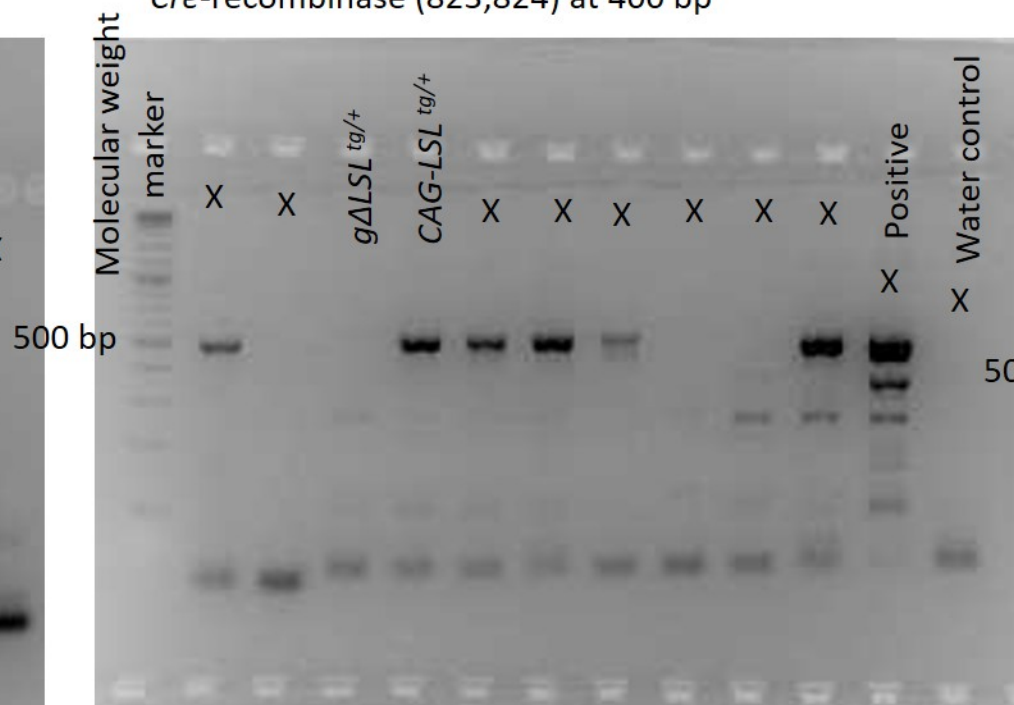

*gΔLSL* (880, 883) at 450 bp

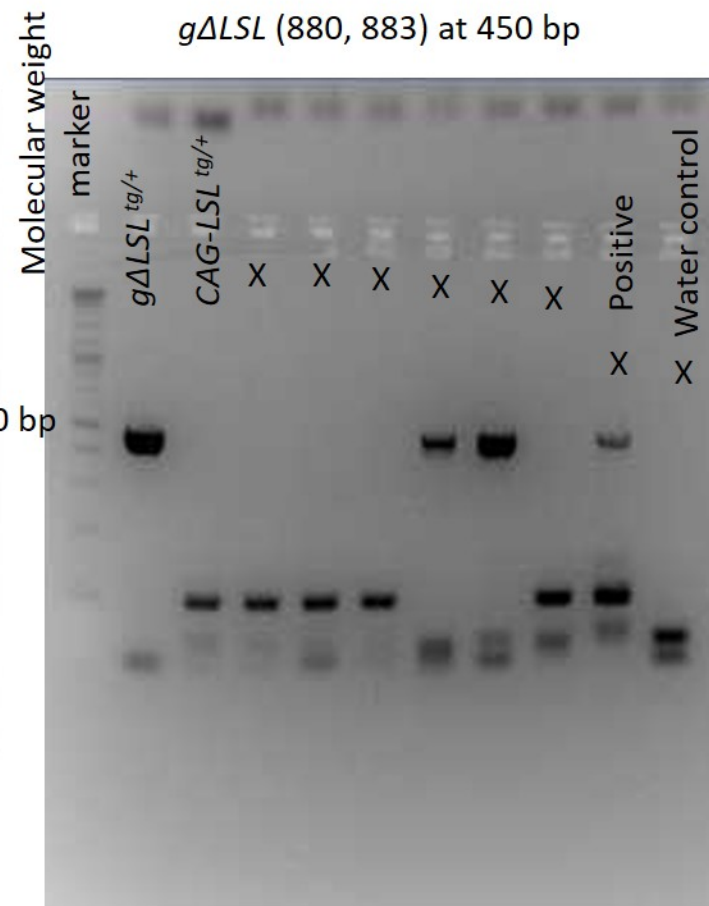

Method to capture image: Scanned autoradiography film  
Figure panel: Figure 2(B)

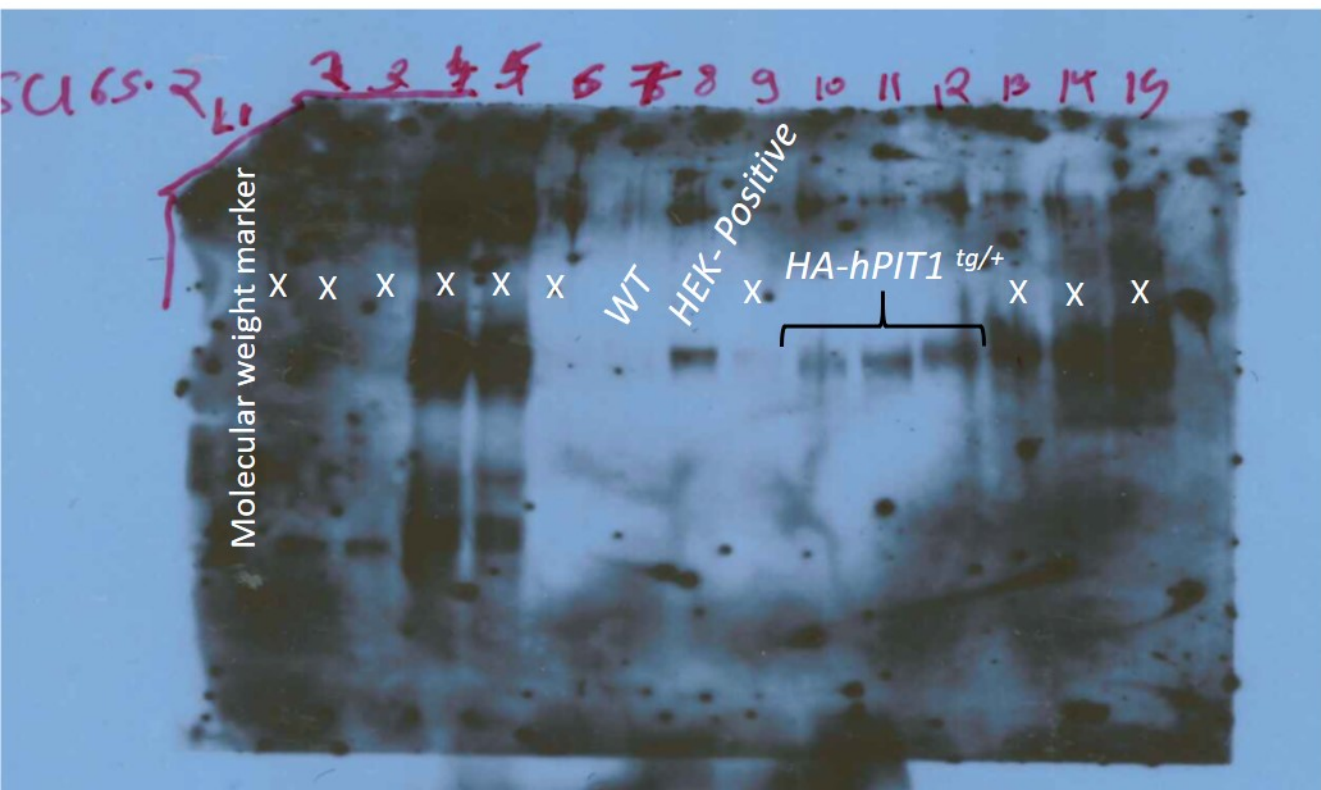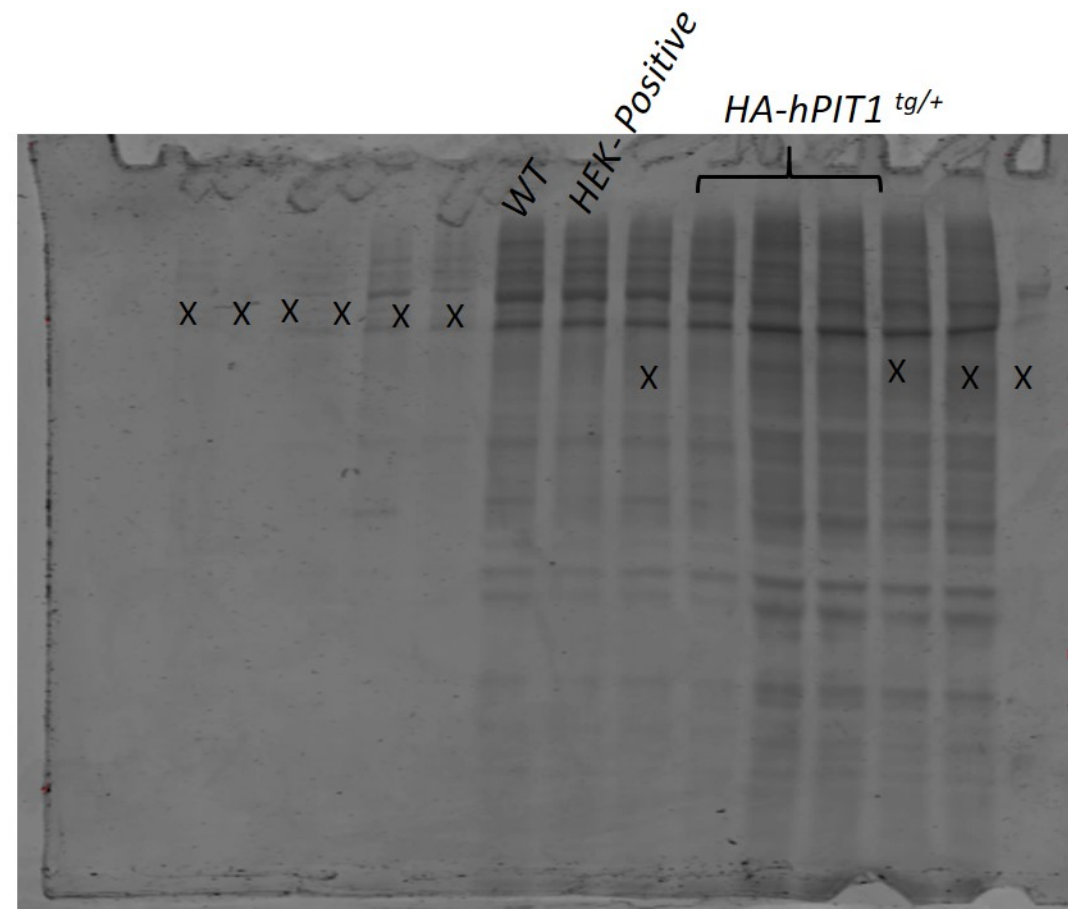

Method to capture image: Scanned autoradiography film

Figure panel: Figure 2(D)

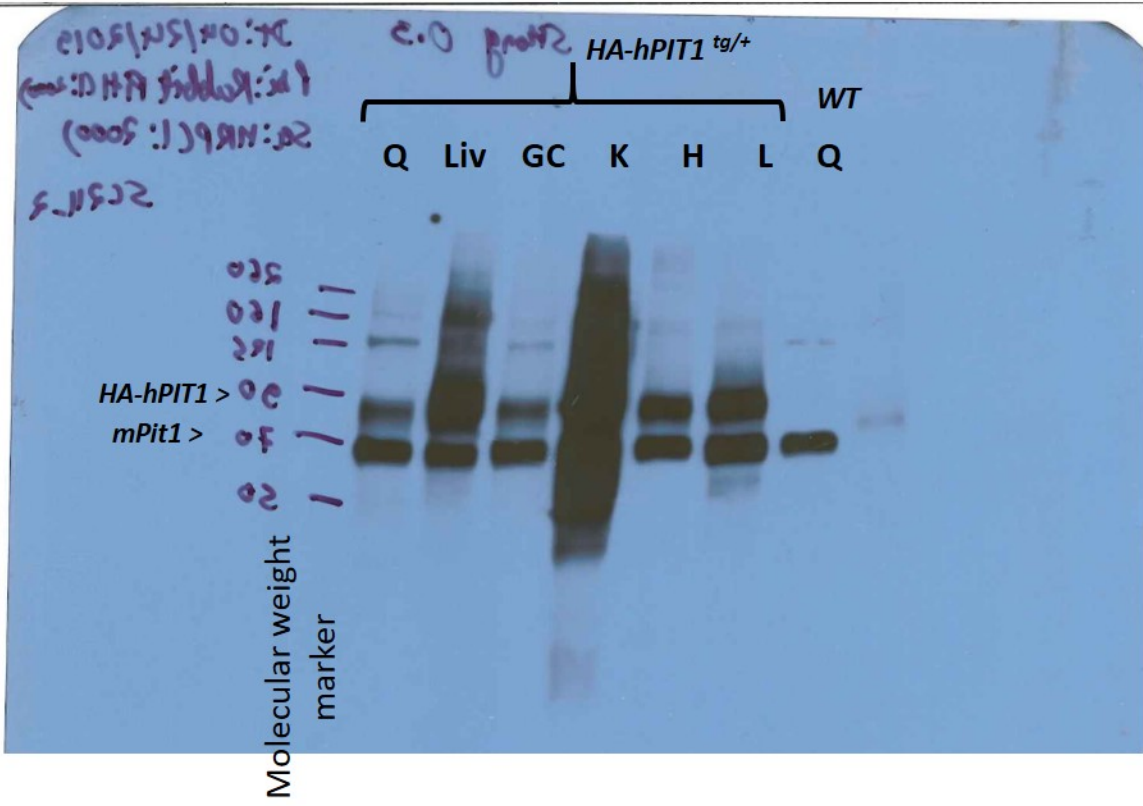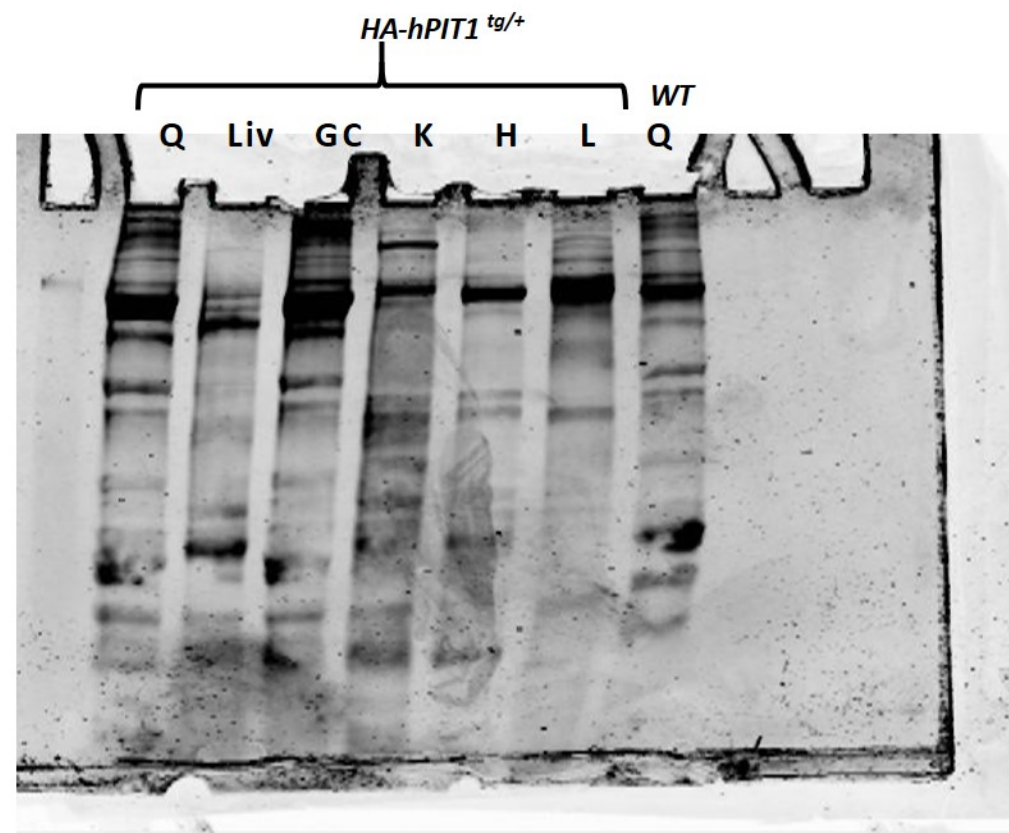



Method to capture image: Scanned autoradiography film

Figure panel: Figure 2(D)

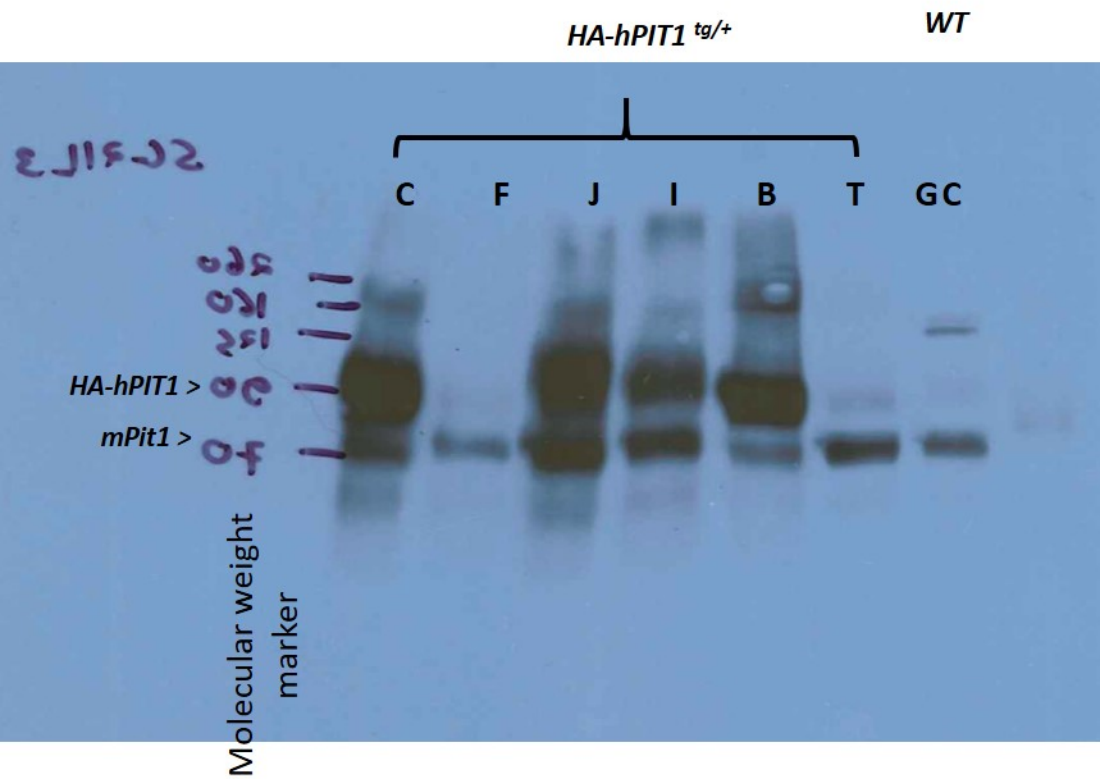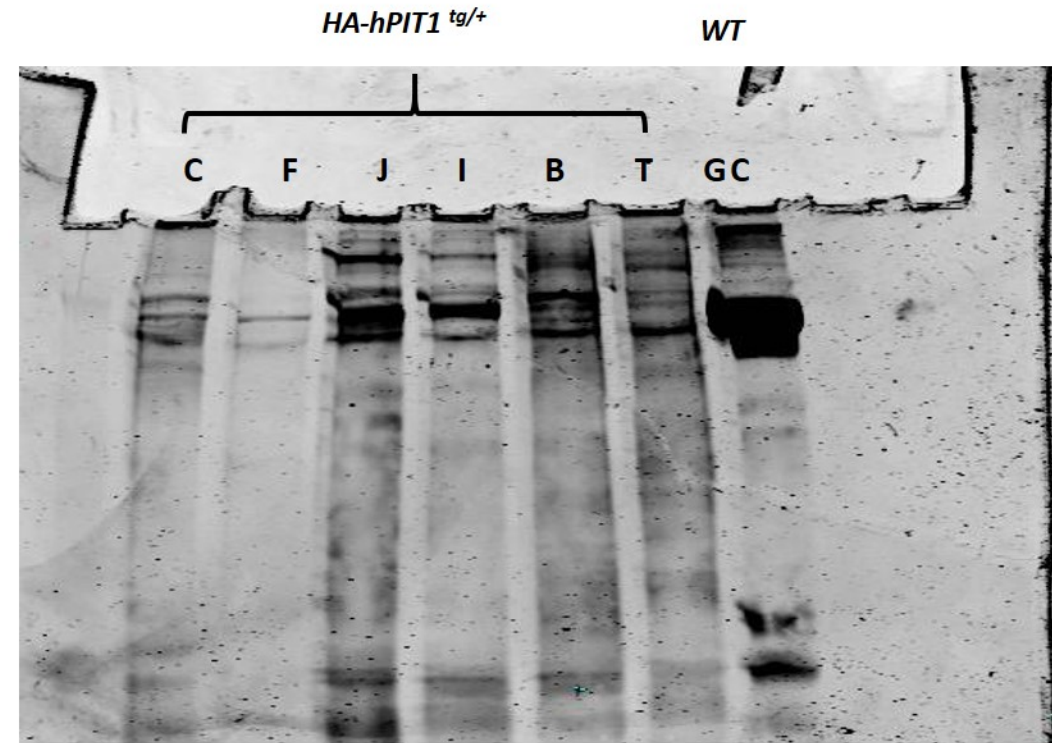

# Method to capture image: Scanned autoradiography film

Figure panel: Figure 2(F)

|               | HA-hPIT1 <sup>tg/+</sup> |   | WT |   | HA-hPIT1 <sup>tg/+</sup> |   | WT |   |
|---------------|--------------------------|---|----|---|--------------------------|---|----|---|
| IP: anti-HA   | -                        | + | -  | + | -                        | - | -  | - |
| IB: anti-Pit1 | +                        | + | +  | + | +                        | + | +  | + |

|               | HA-hPIT1 <sup>tg/+</sup> |   | WT |   | HA-hPIT1 <sup>tg/+</sup> |   | WT |   |
|---------------|--------------------------|---|----|---|--------------------------|---|----|---|
| IP: anti-HA   | -                        | + | -  | + | -                        | - | -  | - |
| IB: anti-Pit1 | +                        | + | +  | + | +                        | + | +  | + |

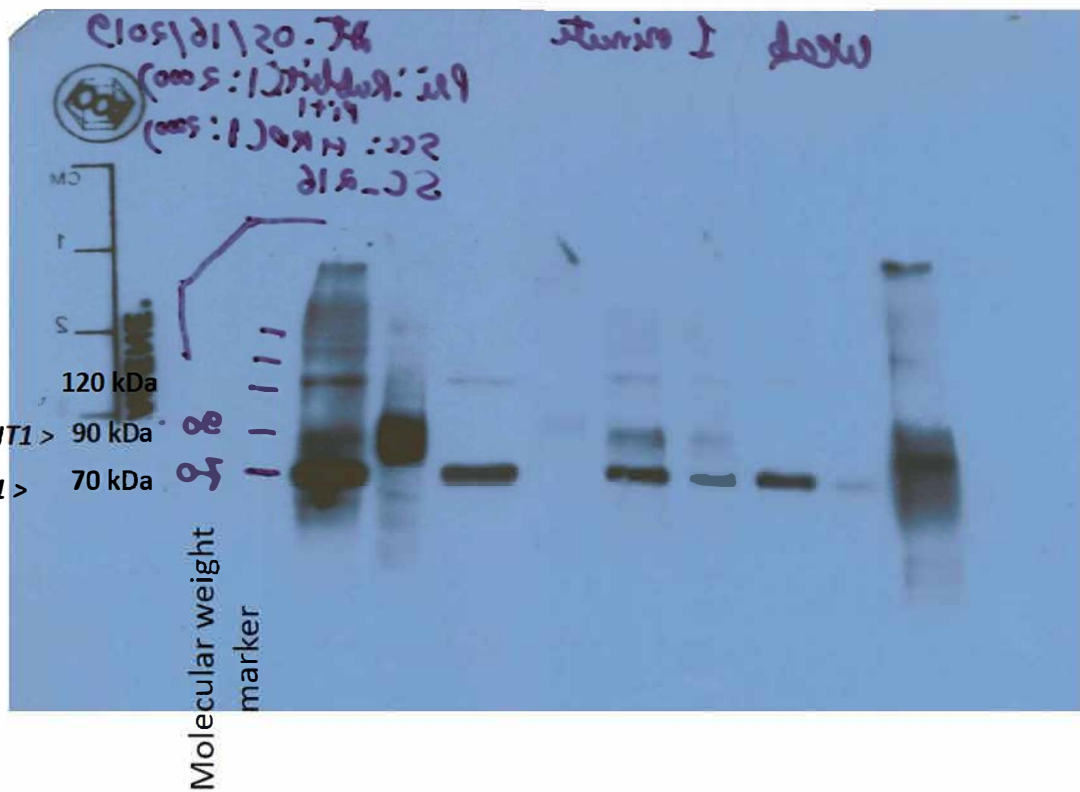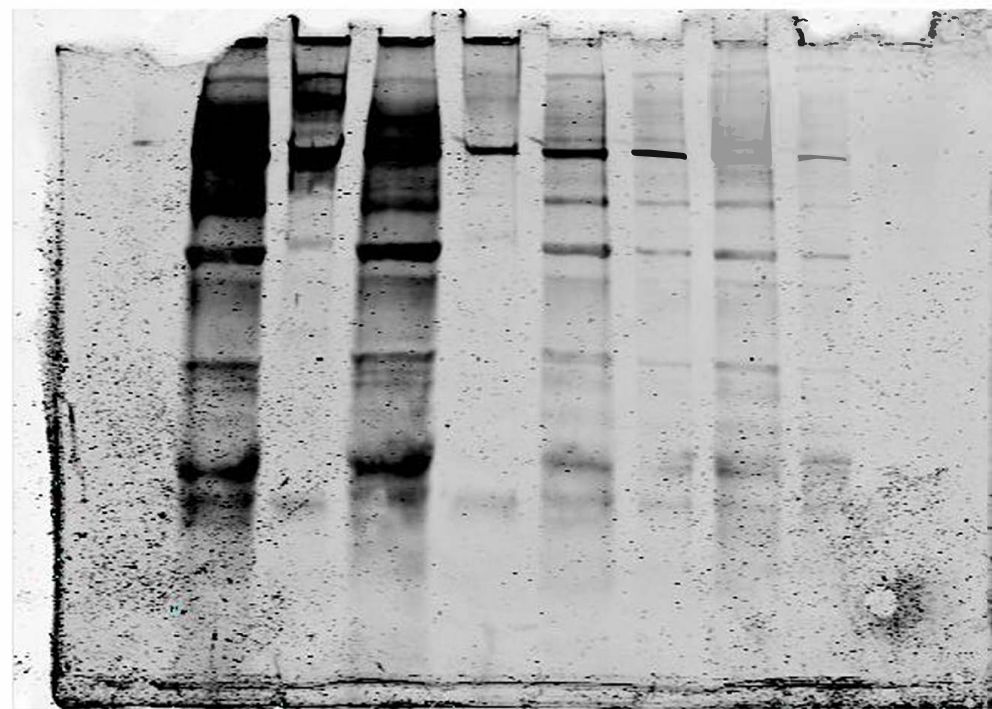

Supplement: pone.0223052.s003.pdf [file pone.0223052.s003.pdf]
